# Supplementary material for: Nitrogen Addition and Heterotroph Exclusion Affected Plant Species Diversity–Biomass Relationship by Affecting Plant Functional Traits
Source: MDPI journal article supplement (doi:10.3390/plants13020258), 2024-01-16
Supplement: s1 [file s1]

**Table S1.** Three-way ANOVA Table (a) Effects of nitrogen addition, species compositions, heterotrophs removal treatment, and (b) Effects of nitrogen addition, species richness, and heterotrophs removal treatment on above-, below-ground, total biomass and functional traits of plant leaves and roots.

| Variables | Aboveground biomass | Belowground biomass | Total biomass | Leaf area | Root length | Root diameter | root tip number |
|-----------|---------------------|---------------------|---------------|-----------|-------------|---------------|-----------------|
| (a)       |                     |                     |               |           |             |               |                 |
| NA        | <0.001              | <0.001              | <0.001        | 0.861     | <0.001      | 0.002         | <0.001          |
| SC        | <0.001              | <0.001              | <0.001        | <0.001    | <0.001      | <0.001        | <0.001          |
| HR        | 0.750               | <0.001              | 0.057         | 0.356     | 0.013       | 0.002         | 0.125           |
| NA×SC     | <0.001              | 0.015               | <0.001        | <0.001    | <0.001      | 0.584         | <0.001          |
| NA×HR     | 0.539               | 0.591               | 0.483         | 0.952     | 0.389       | 0.847         | <0.001          |
| SC×HR     | 0.010               | 0.103               | 0.028         | 0.374     | 0.030       | 0.889         | 0.062           |
| NA×SC×HR  | 0.001               | 0.485               | 0.020         | 0.424     | 0.003       | 0.602         | 0.032           |
| (b)       |                     |                     |               |           |             |               |                 |
| NA        | <0.001              | <0.001              | <0.001        | 0.655     | <0.001      | 0.043         | <0.001          |
| SR        | 0.038               | 0.177               | 0.386         | 0.004     | 0.264       | 0.147         | 0.009           |
| HR        | 0.699               | <0.001              | 0.177         | 0.643     | 0.196       | 0.016         | 0.125           |
| NA×SR     | 0.057               | 0.015               | 0.783         | 0.249     | 0.753       | 0.470         | 0.266           |
| NA×HR     | 0.689               | 0.527               | 0.525         | 0.649     | 0.524       | 0.935         | 0.003           |
| SR×HR     | 0.102               | 0.366               | 0.069         | 0.275     | 0.769       | 0.328         | 0.358           |
| NA×SR×HR  | 0.188               | 0.569               | 0.155         | 0.983     | 0.787       | 0.361         | 0.367           |

<sup>1</sup> Notes: NA represents Nitrogen addition, SC represents Species composition, SR represents Species richness, HR represents Heterotrophic removal treatment. Cells with significant impact are displayed in bold.

**Table S2.** The plant functional traits of *Perilla frutescens*, *Bletilla striata* and *Bidens pilosa*

| Plants               | Height<br>(cm) | Basal diameter<br>(mm) | Leaf area<br>(mm <sup>2</sup> ) | Root length<br>(cm) | Root diameter<br>(mm) | root tip<br>number |
|----------------------|----------------|------------------------|---------------------------------|---------------------|-----------------------|--------------------|
| <i>P. frutescens</i> | 18.1           | 2.7                    | 285.5                           | 308.7               | 0.773                 | 1291               |
| <i>B. striata</i>    | 30.1           | 1.3                    | 936.7                           | 190.1               | 1.314                 | 843                |
| <i>B. pilosa</i>     | 39.7           | 2.7                    | 538.9                           | 290.5               | 0.741                 | 686                |

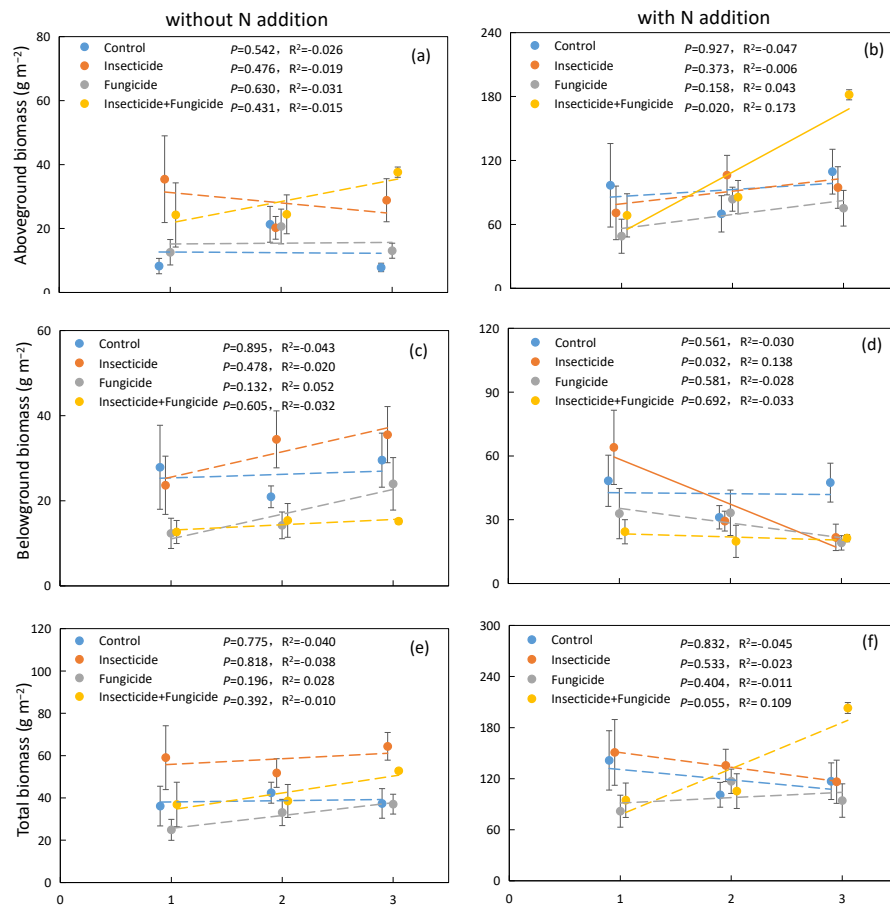

**Figure S1.** Linear regression of species richness on plant aboveground biomass (a), belowground biomass (c), and total biomass (e) in systems without N addition and plant aboveground biomass (b), belowground biomass (d), and total biomass (f) in systems with N addition under different heterotrophs removal treatment.

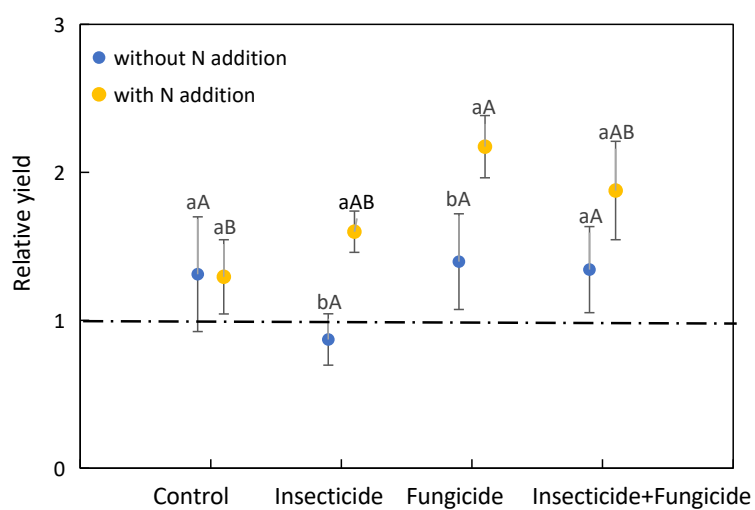

**Figure S2.** The relative yield of *B. pilosa* under different heterotroph treatments and N availability. Significant differences between heterotroph removal were indicated in capital letters, and significant differences between N availability were indicated in lowercase letters. Blue circle: without N addition; yellow, with N addition.

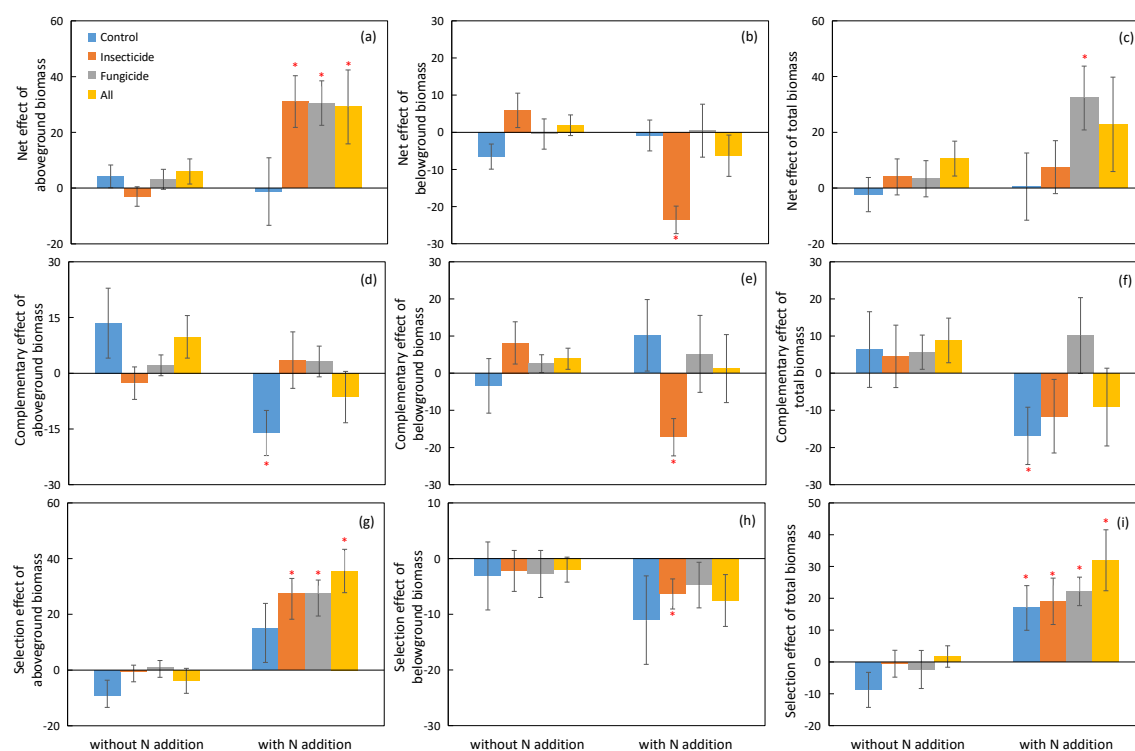

**Figure S3.** Net effect of aboveground biomass (a), belowground biomass (b), and total biomass (c); complementary effect of aboveground biomass (d), belowground biomass (e), and total biomass (f); selection effect of aboveground biomass (g), belowground biomass (h), and total biomass (j) under different heterotroph removal treatments. \*Represents a significant effect under this treatment. Blue bar: control; orange, insecticide; gray, fungicide; yellow, insecticide and fungicide.

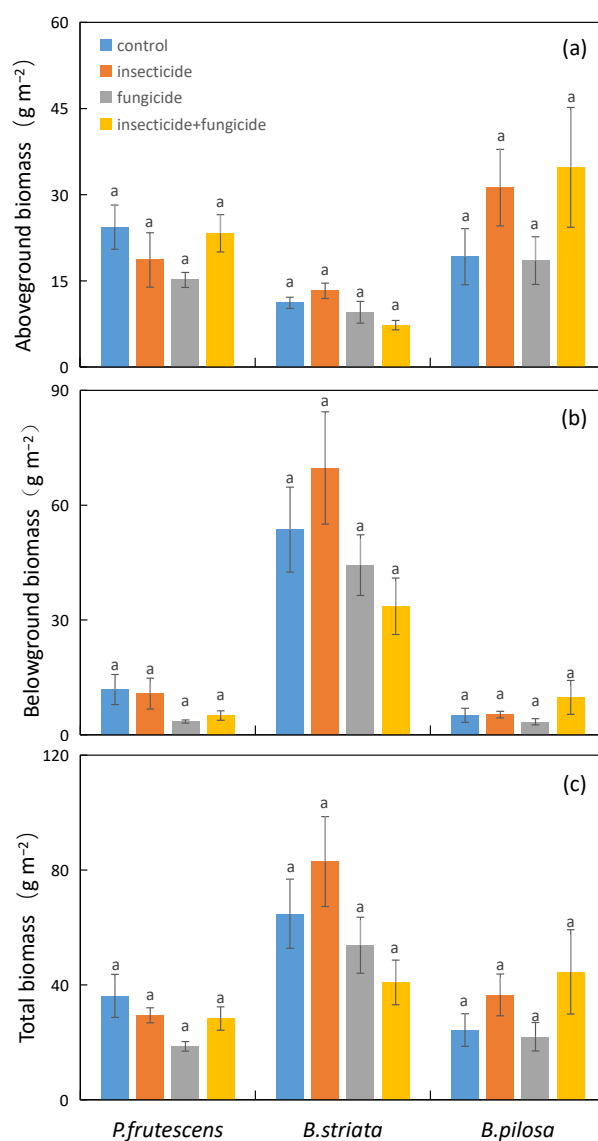

**Figure S4.** Aboveground (a), belowground(b), and total biomass (c) of plant monoculture under different heterotrophs treatments. Same lowercase letters indicate no difference between heterotrophs removal. Blue bar: control; orange, insecticide; gray, fungicide; yellow, insecticide and fungicide.
